# Supplementary material
Source: PubMed Central journal article supplement (PMC1559771)

**a**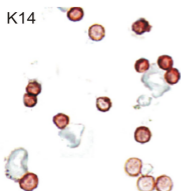**b**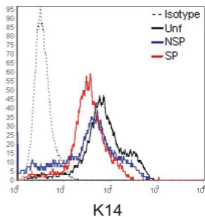**c**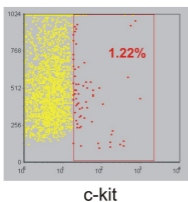**d**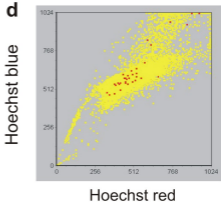**e**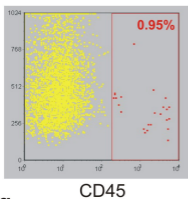**f**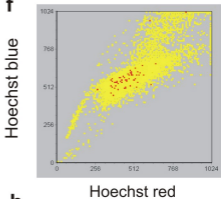**g**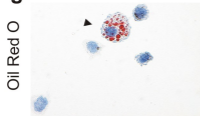**h**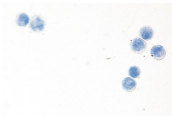

Supplement: pnas_0602579103_1.pdf [file pnas_0602579103_1.pdf]
